# Supplementary material for: Genome-wide assessment of genetic risk loci for childhood acute lymphoblastic leukemia in Japanese patients
Source: PubMed Central journal article supplement — Haematologica. 2023 Oct 26;109(4):1247–52. doi: 10.3324/haematol.2023.282914 (PMC10985430; doi:10.3324/haematol.2023.282914), 2023-10-26
Supplement: 2023_282914_HANGAI_SUPPL.pdf [file 2023_282914_HANGAI_SUPPL.pdf]

# Genome-wide assessment of genetic risk loci for childhood acute lymphoblastic leukemia in Japanese patients

Mayumi Hangai,<sup>1,2\*</sup> Takahisa Kawaguchi,<sup>3\*</sup> Masatoshi Takagi,<sup>4</sup> Keitaro Matsuo,<sup>5</sup> Soyoung Jeon,<sup>6</sup> Charleston W.K. Chiang,<sup>6,7</sup> Andrew T. Dewan,<sup>8</sup> Adam J. de Smith,<sup>6</sup> Toshihiko Imamura,<sup>9</sup> Yasuhiro Okamoto,<sup>10</sup> Akiko M. Saito,<sup>11</sup> Takao Deguchi,<sup>12</sup> Michiaki Kubo,<sup>13</sup> Yoichi Tanaka,<sup>14</sup> Yoko Ayukawa,<sup>1</sup> Toshinari Hori,<sup>15</sup> Kentaro Ohki,<sup>16</sup> Nobutaka Kiyokawa,<sup>16</sup> Takeshi Inukai,<sup>17</sup> Yuki Arakawa,<sup>18</sup> Makiko Mori,<sup>18</sup> Daisuke Hasegawa,<sup>19</sup> Daisuke Tomizawa,<sup>12</sup> Hiroko Fukushima,<sup>20</sup> Yuki Yuza,<sup>21</sup> Yasushi Noguchi,<sup>22</sup> Yuichi Taneyama,<sup>23</sup> Setsuo Ota,<sup>24</sup> Hiroaki Goto,<sup>25</sup> Masakatsu Yanagimachi,<sup>25</sup> Dai Keino,<sup>25</sup> Kazutoshi Koike,<sup>26</sup> Daisuke Toyama,<sup>27</sup> Yozo Nakazawa,<sup>28</sup> Kozue Nakamura,<sup>29</sup> Koichi Moriwaki,<sup>30</sup> Yujin Sekinaka,<sup>31</sup> Daisuke Morita,<sup>28</sup> Shinsuke Hirabayashi,<sup>32</sup> Yosuke Hosoya,<sup>19</sup> Yuri Yoshimoto,<sup>33</sup> Hiroki Yoshihara,<sup>19</sup> Miwa Ozawa,<sup>19</sup> Shinobu Kobayashi,<sup>1</sup> Naho Morisaki,<sup>1</sup> Tshewang Gyeltshen,<sup>34</sup> Osamu Takahashi,<sup>34</sup> Yukinori Okada,<sup>35,36,37</sup> Makiko Matsuda,<sup>38</sup> Toshihiro Tanaka,<sup>38</sup> Johji Inazawa,<sup>39</sup> Junko Takita,<sup>40</sup> Yasushi Ishida,<sup>41</sup> Akira Ohara,<sup>42</sup> Catherine Metayer,<sup>43</sup> Joseph L. Wiemels,<sup>6</sup> Xiaomei Ma,<sup>8</sup> Shuki Mizutani,<sup>4</sup> Katsuyoshi Koh,<sup>18</sup> Yukihide Momozawa,<sup>13</sup> Keizo Horibe,<sup>11</sup> Fumihiko Matsuda,<sup>3</sup> Motohiro Kato,<sup>2#</sup> Atsushi Manabe<sup>32#</sup> and Kevin Y. Urayama<sup>1,34#</sup>

<sup>1</sup>Department of Social Medicine, National Center for Child Health and Development, Tokyo, Japan; <sup>2</sup>Department of Pediatrics, the University of Tokyo, Tokyo, Japan; <sup>3</sup>Center for Genomic Medicine, Kyoto University Graduate School of Medicine, Kyoto, Japan; <sup>4</sup>Department of Pediatrics and Developmental Biology, Tokyo Medical and Dental University, Tokyo, Japan; <sup>5</sup>Division of Cancer Epidemiology and Prevention, Aichi Cancer Center Research Institute, Nagoya, Japan; <sup>6</sup>Center for Genetic Epidemiology, Department of Population and Public Health Sciences, Keck School of Medicine, University of Southern California, Los Angeles, CA, USA; <sup>7</sup>Department of Quantitative and Computational Biology, University of Southern California, Los Angeles, CA, USA; <sup>8</sup>Department of Chronic Disease Epidemiology, Yale School of Public Health, New Haven, CO, USA; <sup>9</sup>Department of Pediatrics, Kyoto Prefectural University of Medicine, Kyoto, Japan; <sup>10</sup>Department of Pediatrics, Graduate School of Medical and Dental Sciences, Kagoshima University, Kagoshima, Japan; <sup>11</sup>Clinical Research Center, National Hospital Organization Nagoya Medical Center, Nagoya, Japan; <sup>12</sup>Children's Cancer Center, National Center for Child Health and Development, Tokyo, Japan; <sup>13</sup>Laboratory for Genotyping Development, RIKEN Center for Integrative Medical Sciences, Kanagawa, Japan; <sup>14</sup>Division of Medicinal Safety Science, National Institute of Health Sciences, Kawasaki, Japan; <sup>15</sup>Department of Pediatrics, Aichi Medical University Hospital, Nagoya, Japan; <sup>16</sup>Department of Pediatric Hematology and Oncology Research, National Center for Child Health and Development, Tokyo, Japan;

<sup>17</sup>Department of Pediatrics, University of Yamanashi, Yamanashi, Japan; <sup>18</sup>Department of Hematology/Oncology, Saitama Children's Medical Center, Saitama, Japan; <sup>19</sup>Department of Pediatrics, St. Luke's International Hospital, Tokyo, Japan; <sup>20</sup>Department of Child Health, Faculty of Medicine, University of Tsukuba, Tsukuba, Japan; <sup>21</sup>Department of Hematology/Oncology, Tokyo Metropolitan Children's Medical Center, Tokyo, Japan; <sup>22</sup>Department of Pediatrics, Japanese Red Cross Narita Hospital, Chiba, Japan; <sup>23</sup>Department of Hematology/Oncology, Chiba Children's Hospital, Chiba, Japan; <sup>24</sup>Department of Pediatrics, Teikyo University Chiba Medical Center, Chiba, Japan; <sup>25</sup>Division of Hematology/Oncology, Kanagawa Children's Medical Center, Yokohama, Japan; <sup>26</sup>Division of Pediatric Hematology and Oncology, Ibaraki Children's Hospital, Mito, Japan; <sup>27</sup>Division of Pediatrics, Showa University Fujigaoka Hospital, Yokohama, Japan; <sup>28</sup>Department of Pediatrics, Shinshu University School of Medicine, Matsumoto, Japan; <sup>29</sup>Department of Pediatrics, Teikyo University Hospital, Tokyo, Japan; <sup>30</sup>Department of Pediatrics, Saitama Medical Center, Saitama Medical University, Saitama, Japan; <sup>31</sup>Department of Pediatrics, National Defense Medical College, Saitama, Japan; <sup>32</sup>Department of Pediatrics, Hokkaido University, Sapporo, Japan; <sup>33</sup>Department of Pediatrics, National Center for Global Health and Medicine, Tokyo, Japan; <sup>34</sup>Graduate School of Public Health, St. Luke's International University, Tokyo, Japan; <sup>35</sup>Department of Statistical Genetics, Graduate School of Medicine, Osaka University, Osaka, Japan; <sup>36</sup>Department of Genome Informatics, Graduate School of Medicine, the University of Tokyo, Tokyo, Japan; <sup>37</sup>Laboratory for Systems Genetics, RIKEN Center for Integrative Medical Sciences, Kanagawa, Japan; <sup>38</sup>Department of Human Genetics and Disease Diversity, Tokyo Medical Dental University, Tokyo, Japan; <sup>39</sup>Department of Molecular Cytogenetics, Tokyo Medical and Dental University, Tokyo, Japan; <sup>40</sup>Department of Pediatrics, Kyoto University Graduate School of Medicine, Kyoto, Japan; <sup>41</sup>Pediatric Medical Center, Ehime Prefectural Central Hospital, Matsuyama, Japan; <sup>42</sup>Department of Pediatrics, Toho University, Tokyo, Japan and <sup>43</sup>School of Public Health, University of California Berkeley, Berkeley, CA, USA

*\*MH and TK contributed equally as first authors.*

*#KYU, AM and MK contributed equally as senior authors.*

Correspondence:

K.Y. URAYAMA - kevrurayama@gmail.com

<https://doi.org/10.3324/haematol.2023.282914>

## Supplementary Information

### Genome-wide assessment of genetic risk loci for childhood acute lymphoblastic leukemia in Japanese

\*Mayumi Hangai<sup>1,2</sup>, \*Takahisa Kawaguchi<sup>3</sup>, Masatoshi Takagi<sup>4</sup>, Keitaro Matsuo<sup>5</sup>, Soyoung Jeon<sup>6</sup>, Charleston W.K. Chiang<sup>6,7</sup>, Andrew T. Dewan<sup>8</sup>, Adam J. de Smith<sup>6</sup>, Toshihiko Imamura<sup>9</sup>, Yasuhiro Okamoto<sup>10</sup>, Akiko M. Saito<sup>11</sup>, Takao Deguchi<sup>12</sup>, Michiaki Kubo<sup>13</sup>, Yoichi Tanaka<sup>14</sup>, Yoko Ayukawa<sup>1</sup>, Toshinari Hori<sup>15</sup>, Kentaro Ohki<sup>16</sup>, Nobutaka Kiyokawa<sup>16</sup>, Takeshi Inukai<sup>17</sup>, Yuki Arakawa<sup>18</sup>, Makiko Mori<sup>18</sup>, Daisuke Hasegawa<sup>19</sup>, Daisuke Tomizawa<sup>12</sup>, Hiroko Fukushima<sup>20</sup>, Yuki Yuza<sup>21</sup>, Yasushi Noguchi<sup>22</sup>, Yuichi Taneyama<sup>23</sup>, Setsuo Ota<sup>24</sup>, Hiroaki Goto<sup>25</sup>, Masakatsu Yanagimachi<sup>25</sup>, Dai Keino<sup>25</sup>, Kazutoshi Koike<sup>26</sup>, Daisuke Toyama<sup>27</sup>, Yozo Nakazawa<sup>28</sup>, Kozue Nakamura<sup>29</sup>, Koichi Moriwaki<sup>30</sup>, Yujin Sekinaka<sup>31</sup>, Daisuke Morita<sup>28</sup>, Shinsuke Hirabayashi<sup>32</sup>, Yosuke Hosoya<sup>19</sup>, Yuri Yoshimoto<sup>33</sup>, Hiroki Yoshihara<sup>19</sup>, Miwa Ozawa<sup>19</sup>, Shinobu Kobayashi<sup>1</sup>, Naho Morisaki<sup>1</sup>, Tshewang Gyeltshen<sup>34</sup>, Osamu Takahashi<sup>34</sup>, Yukinori Okada<sup>35,36,37</sup>, Makiko Matsuda<sup>38</sup>, Toshihiro Tanaka<sup>38</sup>, Johji Inazawa<sup>39</sup>, Junko Takita<sup>40</sup>, Yasushi Ishida<sup>41</sup>, Akira Ohara<sup>42</sup>, Catherine Metayer<sup>43</sup>, Joseph L. Wiemels<sup>6</sup>, Xiaomei Ma<sup>8</sup>, Shuki Mizutani<sup>4</sup>, Katsuyoshi Koh<sup>18</sup>, Yukihide Momozawa<sup>13</sup>, Keizo Horibe<sup>11</sup>, Fumihiko Matsuda<sup>3</sup>, #Motohiro Kato<sup>2</sup>, #Atsushi Manabe<sup>32</sup>, #Kevin Y. Urayama<sup>1,34</sup>

\*MH and TK contributed equally to this work.

#KYU, AM, and MK jointly directed this work.

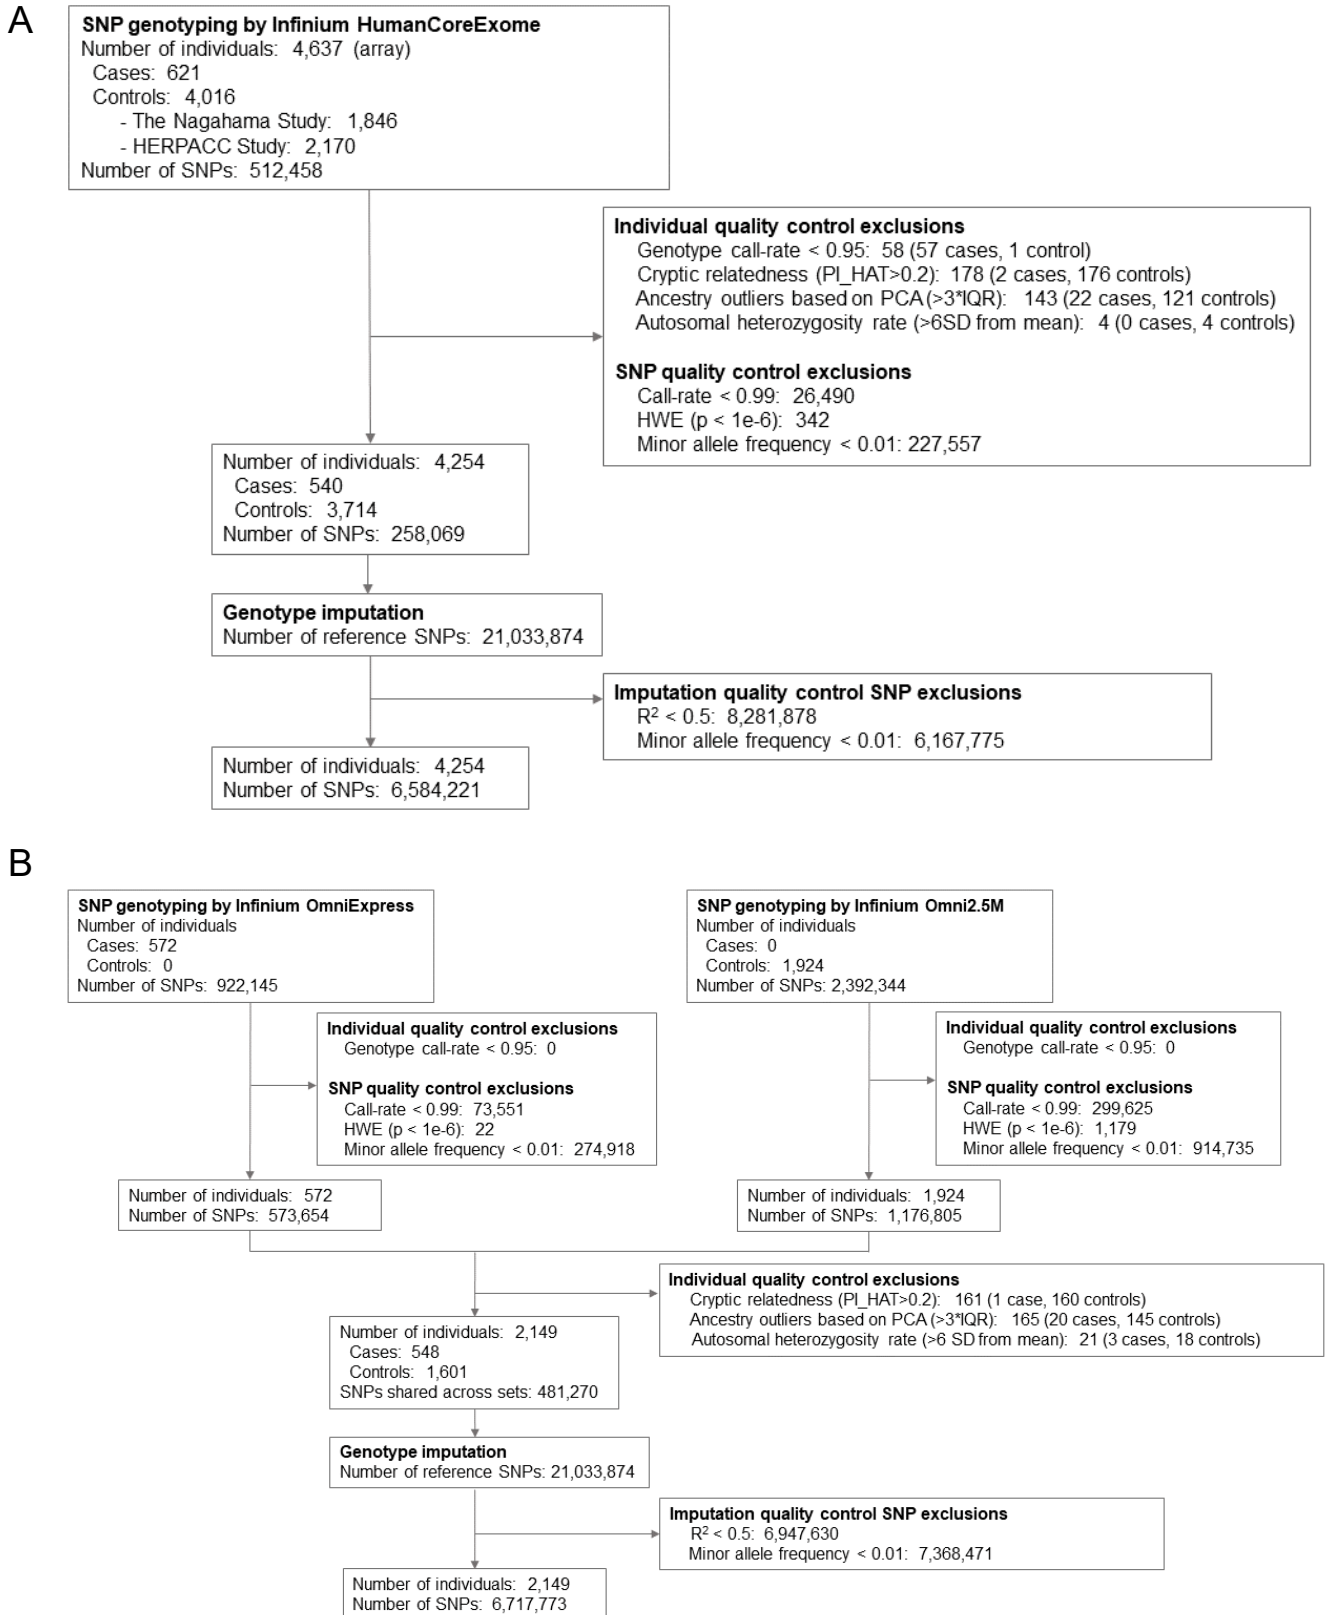

**Supplementary Figure 1. Flow of individual and genotype quality control.** (A) TCCSG GWAS cases and controls were genotyped using the Illumina HumanCoreExome microarray Infinium assay. (B) JPLSG GWAS cases and controls were genotyped using the Illumina Omni family of microarrays Infinium assay.

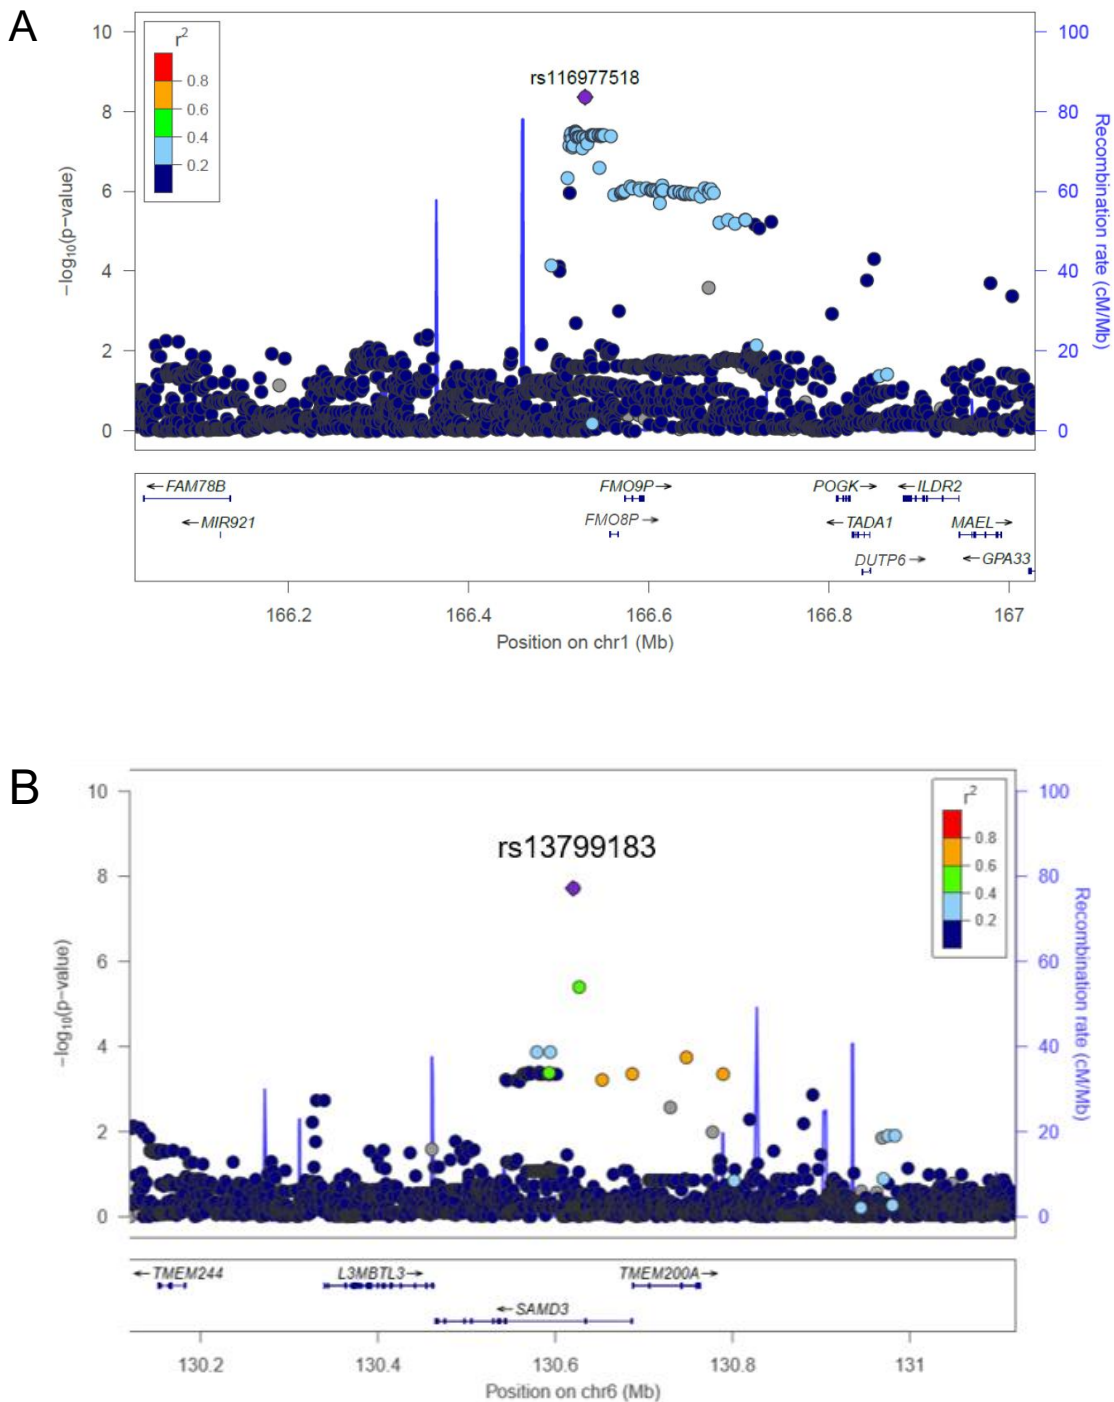

**Supplementary Figure 2. Results of the putative novel ALL risk loci identified in the TCCSG and JPLSG genome-wide association analyses.** (A) Regional plot of the TCCSG GWAS results around the genome-wide significant region identified at chromosome 1q24.1. The leading SNP is represented as a purple diamond and the colors of the surrounding SNPs show the degree of correlation ( $r^2$ ) to the leading SNP. (B) Regional plot of JPLSG GWAS results around the genome-wide significant region identified in *SAMD3* at chromosome 6q23.1.

**Supplementary Table 1.** Results of previous GWAS-identified SNPs and targeted examination of the candidate loci in Japanese

| Study, year                                                          | SNP         | Chr:position <sup>a</sup> | Allele <sup>b</sup> | Allele frequency <sup>c</sup> | Previous report          |                         | TCGG+JPLSG GWAS (Japanese) |                         |
|----------------------------------------------------------------------|-------------|---------------------------|---------------------|-------------------------------|--------------------------|-------------------------|----------------------------|-------------------------|
|                                                                      |             |                           |                     | CEU/AMR/AFR/JPT               | OR (95% CI) <sup>d</sup> | <i>P</i>                | OR (95% CI) <sup>d</sup>   | <i>P<sub>meta</sub></i> |
| <b><i>ARID5B</i> (r<sup>2</sup>: JPT=1.00, EUR=1.00)<sup>e</sup></b> |             |                           |                     |                               |                          |                         |                            |                         |
| Trevino, 2009 <sup>1</sup>                                           | rs10821936  | 10:63723577               | C / T               | 0.32/0.48/0.20/0.34           | 1.91 (1.6–2.2)           | 1.4×10 <sup>-15</sup>   | 1.83 (1.63–2.04)           | 2.4×10 <sup>-25</sup>   |
| Current (leading SNP)                                                | rs7896246   | 10:63724390               | A / G               | 0.32/0.46/0.04/0.34           | -                        | -                       | 1.83 (1.63–2.05)           | 1.4×10 <sup>-25</sup>   |
| <b><i>IKZF1</i> (r<sup>2</sup>: JPT&lt;0.01, EUR&lt;0.01)</b>        |             |                           |                     |                               |                          |                         |                            |                         |
| Papaemmanuil, 2009 <sup>2</sup>                                      | rs4132601   | 7:50470604                | G / T               | 0.28/0.23/0.18/0.09           | 1.69 (1.58–1.81)         | 1.2×10 <sup>-19</sup>   | 1.38 (1.14–1.67)           | 1.0×10 <sup>-3</sup>    |
| Current (leading SNP)                                                | rs77563422  | 7:50454209                | G / C               | 0.00/0.19/0.09/0.16           | -                        | -                       | 1.55 (1.35–1.78)           | 5.9×10 <sup>-10</sup>   |
| <b><i>DDC</i> (r<sup>2</sup>: JPT=1.00, EUR=0.46)</b>                |             |                           |                     |                               |                          |                         |                            |                         |
| Papaemmanuil, 2009 <sup>2</sup>                                      | rs7809758   | 7:50573333                | G / A               | 0.39/0.45/0.34/0.25           | 1.44 (1.32–1.54)         | 2.4×10 <sup>-10</sup>   | 1.27 (1.13–1.44)           | 1.1×10 <sup>-4</sup>    |
| Current (leading SNP)                                                | rs7808025   | 7:50576903                | A / G               | 0.26/0.35/0.36/0.24           | -                        | -                       | 1.28 (1.13–1.45)           | 9.0×10 <sup>-5</sup>    |
| <b><i>CEBPE</i> (r<sup>2</sup>: JPT=0.38, EUR=0.73)</b>              |             |                           |                     |                               |                          |                         |                            |                         |
| Papaemmanuil, 2009 <sup>2</sup>                                      | rs2239633   | 14:23589057               | G / A               | 0.55/0.55/0.83/0.47           | 1.34 (1.22–1.45)         | 2.9×10 <sup>-7</sup>    | 1.15 (1.03–1.29)           | 0.013                   |
| Current (leading SNP)                                                | rs2239630   | 14:23589349               | A / G               | 0.49/0.52/0.94/0.48           | -                        | -                       | 1.19 (1.06–1.33)           | 2.7×10 <sup>-3</sup>    |
| <b><i>CDKN2A (1)</i> (r<sup>2</sup>: JPT=0.07, EUR=NA)</b>           |             |                           |                     |                               |                          |                         |                            |                         |
| Sherborne, 2010 <sup>3</sup>                                         | rs3731217   | 9:21984661                | A / C               | 0.86/0.91/0.90/0.82           | 1.41 (1.28–1.56)         | 3.0×10 <sup>-11</sup>   | 0.90 (0.78–1.04)           | 0.16                    |
| Current (leading SNP)                                                | rs149570278 | 9:21993686                | A / G               | 0.00/0.00/0.00/0.01           | -                        | -                       | 1.84 (1.20–2.80)           | 5.0×10 <sup>-3</sup>    |
| <b><i>CDKN2A (2)</i> (r<sup>2</sup>: JPT=NA, EUR=NA)</b>             |             |                           |                     |                               |                          |                         |                            |                         |
| Xu, 2015 <sup>4</sup>                                                | rs3731249   | 9:21970916                | T / C               | 0.03/0.01/0.00/0.00*          | 2.23 (1.90–2.61)         | 9.4 x 10 <sup>-23</sup> | NA                         | NA                      |
| Current (leading SNP)                                                | rs3731235   | 9:21977450                | C / A               | 1.00/1.00/1.00/0.96           | -                        | -                       | 1.34 (1.01–1.79)           | 0.045                   |
| <b><i>CDKN2B</i> (r<sup>2</sup>: JPT=NA, EUR=NA)</b>                 |             |                           |                     |                               |                          |                         |                            |                         |
| Hungate, 2016 <sup>5</sup>                                           | rs77728904  | 9:22057530                | C / A               | 0.07/0.04/0.10/0.00*          | 1.71 (1.42–2.05)         | 1.0×10 <sup>-8</sup>    | NA                         | NA                      |
| Current (leading SNP)                                                | rs144964843 | 9:22016243                | C / T               | 1.00/1.00/1.00/0.97           | -                        | -                       | 1.44 (1.01–2.05)           | 0.041                   |
| <b><i>PIP4K2A</i> (r<sup>2</sup>: JPT=1.00, EUR=0.96)</b>            |             |                           |                     |                               |                          |                         |                            |                         |
| Xu, 2013 <sup>6</sup>                                                | rs7088318   | 10:22852948               | A / C               | 0.53/0.75/0.34/0.61           | 1.40 (1.28–1.53)         | 1.1×10 <sup>-11</sup>   | 1.17 (1.04–1.31)           | 7.5×10 <sup>-3</sup>    |
| Current (leading SNP)                                                | rs10159730  | 10:22854947               | A / G               | 0.53/0.76/0.43/0.62           | -                        | -                       | 1.22 (1.08–1.37)           | 9.9×10 <sup>-4</sup>    |
| <b><i>GATA3</i> (r<sup>2</sup>: JPT=0.88, EUR=0.36)</b>              |             |                           |                     |                               |                          |                         |                            |                         |
| Perez_Andreu, 2013 <sup>7</sup>                                      | rs3824662   | 10:8104208                | A / C               | 0.13/0.37/0.08/0.31           | 3.85 (2.71–5.47)         | 1.1×10 <sup>-8</sup>    | 1.13 (1.01–1.27)           | 0.040                   |
| Current (leading SNP)                                                | rs374641    | 10:8103980                | C / T               | 0.36/0.49/0.31/0.34           | -                        | -                       | 1.14 (1.02–1.28)           | 0.026                   |
| <b><i>WWOX</i> (r<sup>2</sup>: JPT=0.55, EUR=0.56)</b>               |             |                           |                     |                               |                          |                         |                            |                         |
| Shi, 2016 <sup>8</sup>                                               | rs1121404   | 16:79089869               | C / CT              | 0.60/0.59/0.53/0.38           | 1.38 (1.25–1.54)         | 5.3×10 <sup>-10</sup>   | 1.05 (0.94–1.18)           | 0.38                    |
| Current (leading SNP)                                                | rs9972822   | 16:79094856               | G / C               | 0.56/0.38/0.12/0.22           | -                        | -                       | 1.12 (0.98–1.27)           | 0.095                   |
| <b><i>LHPP</i> (r<sup>2</sup>: JPT=0.23, EUR=0.23)</b>               |             |                           |                     |                               |                          |                         |                            |                         |
| Vijayakrishnan, 2017                                                 | rs35837782  | 10:126293309              | G / A               | 0.66/0.53/0.63/0.61           | 1.21 (1.15–1.28)         | 1.4×10 <sup>-11</sup>   | 1.10 (0.98–1.23)           | 0.11                    |

|                                                        |             |              |       |                     |                  |                       |                  |                      |
|--------------------------------------------------------|-------------|--------------|-------|---------------------|------------------|-----------------------|------------------|----------------------|
| Current (leading SNP)                                  | rs71487970  | 10:126293897 | T / G | 0.30/0.27/0.05/0.25 | -                | -                     | 1.15 (1.01–1.30) | 0.030                |
| <b><i>ELK3</i></b> ( $r^2$ : JPT=0.02, EUR=NA)         |             |              |       |                     |                  |                       |                  |                      |
| Vijayakrishnan, 2017 <sup>9</sup>                      | rs4762284   | 12:96612762  | T / A | 0.31/0.49/0.45/0.56 | 1.19 (1.12–1.26) | $8.4 \times 10^{-9}$  | 1.01 (0.91–1.14) | 0.81                 |
| Current (leading SNP)                                  | rs143908265 | 12:96605017  | A / G | 0.00/0.00/0.00/0.03 | -                | -                     | 1.42 (1.02–1.96) | 0.035                |
| <b><i>IKZF3</i></b> ( $r^2$ : JPT=0.03, EUR=0.81)      |             |              |       |                     |                  |                       |                  |                      |
| Wiemels, 2018 <sup>10</sup>                            | rs2290400   | 17:38066240  | T / C | 0.51/0.60/0.51/0.73 | 1.18 (1.11–1.25) | $2.1 \times 10^{-8}$  | 1.17 (1.03–1.33) | 0.017                |
| Current (leading SNP)                                  | rs12942330  | 17:37939839  | C / T | 0.53/0.65/0.82/0.67 | -                | -                     | 1.16 (1.03–1.31) | 0.014                |
| <b><i>SP4</i></b> ( $r^2$ : JPT=0.04, EUR=0.26)        |             |              |       |                     |                  |                       |                  |                      |
| Wiemels, 2018 <sup>10</sup>                            | rs2390536   | 7:21485397   | A / G | 0.39/0.19/0.04/0.04 | 1.20 (1.13–1.29) | $3.6 \times 10^{-8}$  | 0.97 (0.73–1.28) | 0.81                 |
| Current (leading SNP)                                  | rs9639379   | 7:21484410   | T / G | 0.30/0.59/0.37/0.42 | -                | -                     | 1.15 (1.03–1.28) | 0.014                |
| <b><i>BMI1</i></b> ( $r^2$ : JPT=0.43, EUR=0.73)       |             |              |       |                     |                  |                       |                  |                      |
| de Smith, 2018 <sup>11</sup>                           | rs12769953  | 10:22407656  | T / C | 0.78/0.73/0.81/0.85 | 1.28 (1.21–1.35) | $6.1 \times 10^{-11}$ | 1.00 (0.85–1.18) | 0.983                |
| Current (leading SNP)                                  | rs2986335   | 10:22377233  | A / G | 0.28/0.32/0.74/0.08 | -                | -                     | 1.24 (0.99–1.55) | 0.062                |
| <b><i>8q24.21</i></b> ( $r^2$ : JPT=1.00, EUR=0.99)    |             |              |       |                     |                  |                       |                  |                      |
| Vijayakrishnan, 2018 <sup>12</sup>                     | rs28665337  | 8:130194104  | A / C | 0.11/0.08/0.07/0.02 | 1.34 (1.21–1.47) | $3.9 \times 10^{-9}$  | 1.70 (1.16–2.50) | $6.6 \times 10^{-3}$ |
| Current (leading SNP)                                  | rs5003704   | 8:130222435  | A / G | 0.11/0.08/0.07/0.02 | -                | -                     | 1.77 (1.20–2.60) | $4.0 \times 10^{-3}$ |
| <b><i>ERG</i></b> ( $r^2$ : JPT=0.01, EUR=0.01)        |             |              |       |                     |                  |                       |                  |                      |
| Qian, 2019 <sup>13</sup>                               | rs2836371   | 21:39773528  | C / T | 0.30/0.35/0.05/0.17 | 1.64 (1.40–1.93) | $1.4 \times 10^{-9}$  | 1.05 (0.90–1.21) | 0.511                |
| Current (leading SNP)                                  | rs2410021   | 21:39815267  | T / C | 0.95/0.91/0.85/0.86 | -                | -                     | 1.24 (1.05–1.46) | 0.012                |
| <b><i>9q21.31 (TLE1)</i></b> ( $r^2$ : JPT=NA, EUR=NA) |             |              |       |                     |                  |                       |                  |                      |
| Vijayakrishnan, 2019 <sup>14</sup>                     | rs76925697  | 9:83747371   | A / T | 0.96/0.97/0.97/0.00 | 1.52 (1.31–1.76) | $2.1 \times 10^{-8}$  | NA               | NA                   |
| Current (leading SNP)                                  | rs148407651 | 9:83753262   | G / A | 1.00/1.00/1.00/0.99 | -                | -                     | 1.65 (0.92–2.96) | 0.093                |

Abbreviations: Chr, chromosome; CI, confidence interval; EUR, European ancestry; NA, not available; OR, odds ratio; SNP, single nucleotide polymorphism

<sup>a</sup> Chromosome and genomic positions are based on GRCh37/hg19

<sup>b</sup> Tested allele / other allele.

<sup>c</sup> Tested allele frequencies for CEU (Northern and Western European Ancestry), AMR (Admixed American), and AFR (African) from 1000 Genomes Project data (phase 3); JPT are allele frequencies from the TCCSG control group.

<sup>d</sup> Odds ratio and 95% confidence intervals associated with the tested allele of the leading SNP extracted from the previous genome-wide association study; association results of the tested allele from the current Japanese study are also shown, if available.

<sup>e</sup> Measure of pairwise linkage disequilibrium ( $r^2$ ) between the SNP previously reported and the leading SNP in the current analysis; estimates are based on 1000 Genomes Project data (phase 3)

## References

1. Trevino LR, Yang W, French D, et al. Germline genomic variants associated with childhood acute lymphoblastic leukemia. *Nat Genet.* 2009;41(9):1001-1005.
2. Papaemmanuil E, Hosking FJ, Vijayakrishnan J, et al. Loci on 7p12.2, 10q21.2 and 14q11.2 are associated with risk of childhood acute lymphoblastic leukemia. *Nat Genet.* 2009;41(9):1006-1010.
3. Sherborne AL, Hosking FJ, Prasad RB, et al. Variation in CDKN2A at 9p21.3 influences childhood acute lymphoblastic leukemia risk. *Nat Genet.* 2010;42(6):492-494.
4. Xu H, Zhang H, Yang W, et al. Inherited coding variants at the CDKN2A locus influence susceptibility to acute lymphoblastic leukaemia in children. *Nat Commun.* 2015;6(7553).
5. Hungate EA, Vora SR, Gamazon ER, et al. A variant at 9p21.3 functionally implicates CDKN2B in paediatric B-cell precursor acute lymphoblastic leukaemia aetiology. *Nat Commun.* 2016;7(10635).
6. Xu H, Yang W, Perez-Andreu V, et al. Novel susceptibility variants at 10p12.31-12.2 for childhood acute lymphoblastic leukemia in ethnically diverse populations. *J Natl Cancer Inst.* 2013;105(10):733-742.
7. Perez-Andreu V, Roberts KG, Harvey RC, et al. Inherited GATA3 variants are associated with Ph-like childhood acute lymphoblastic leukemia and risk of relapse. *Nat Genet.* 2013;45(12):1494-1498.
8. Shi Y, Du M, Fang Y, et al. Identification of a novel susceptibility locus at 16q23.1 associated with childhood acute lymphoblastic leukemia in Han Chinese. *Hum Mol Genet.* 2016;25(13):2873-2880.
9. Vijayakrishnan J, Kumar R, Henrion MY, et al. A genome-wide association study identifies risk loci for childhood acute lymphoblastic leukemia at 10q26.13 and 12q23.1. *Leukemia.* 2017;31(3):573-579.
10. Wiemels JL, Walsh KM, de Smith AJ, et al. GWAS in childhood acute lymphoblastic leukemia reveals novel genetic associations at chromosomes 17q12 and 8q24.21. *Nat Commun.* 2018;9(1):286.
11. de Smith AJ, Walsh KM, Francis SS, et al. BMI1 enhancer polymorphism underlies chromosome 10p12.31 association with childhood acute lymphoblastic leukemia. *Int J Cancer.* 2018;143(11):2647-2658.
12. Vijayakrishnan J, Studd J, Broderick P, et al. Genome-wide association study identifies susceptibility loci for B-cell childhood acute lymphoblastic leukemia. *Nat Commun.* 2018;9(1):1340.
13. Qian M, Xu H, Perez-Andreu V, et al. Novel susceptibility variants at the ERG locus for childhood acute lymphoblastic leukemia in Hispanics. *Blood.* 2019;133(7):724-729.
14. Vijayakrishnan J, Qian M, Studd JB, et al. Identification of four novel associations for B-cell acute lymphoblastic leukaemia risk. *Nat Commun.* 2019;10(1):5348.
